# Supplementary material for: Thermochemistry of Polonium Evaporation from LBE
Source: MDPI journal article supplement (doi:10.3390/thermo1020017), 2021-09-08
Supplement: s1 [file s1]

Archive with 1 entries (1 files):
- thermo-1318152-supplementary.pdf
