# Supplementary material for: Thermochemistry of Polonium Evaporation from LBE
Source: MDPI journal article supplement (doi:10.3390/thermo1020017), 2021-09-08
Supplement: s1 [file s1 › thermo-1318152-supplementary.pdf]

# Thermochemistry of polonium evaporation from LBE

Alexander Aerts

## 1. Heat Capacity Correlations for $\text{Po}_2(\text{g})$ , $\text{PbPo}(\text{g})$ and $\text{BiPo}(\text{g})$

The heat capacity as function of temperature for the gas species  $\text{Po}_2(\text{g})$ ,  $\text{PbPo}(\text{g})$  and  $\text{BiPo}(\text{g})$ , calculated by Mertens [1] was correlated using the equation:

$$C_p(T) = A + 10^{-3} BT + 10^5 CT^2 + 10^{-6} DT^2 + 10^8 ET^3 + 10^{-9} FT^3 \quad (\text{S1})$$

The resulting fits are shown in Figures S1 ( $\text{Po}_2(\text{g})$ ) and S2 ( $\text{PbPo}(\text{g})$  and  $\text{BiPo}(\text{g})$ ). The relative residuals, (fitted value – data value)/data value, were less than 1% in the considered temperature ranges.

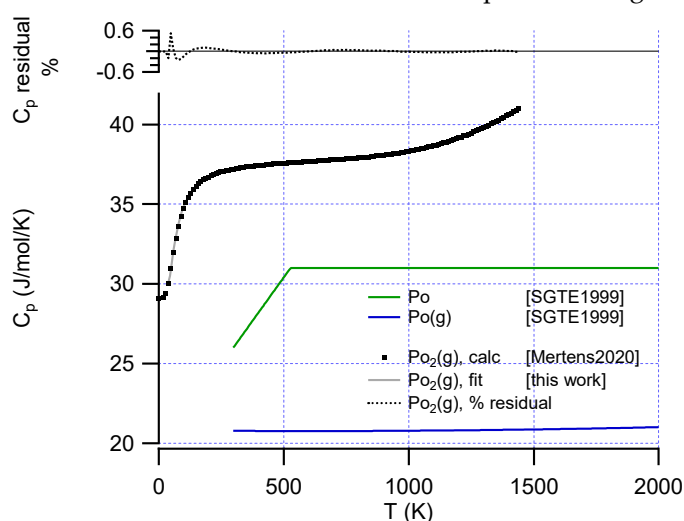

**Figure S1.** (black markers) Heat capacity of  $\text{Po}_2(\text{g})$  by Mertens [1] and (grey line) fit according to Equation (S1) between 48.15 K and 1438.15 K. Top: relative residual for the fit for  $\text{Po}_2(\text{g})$ . The heat capacity functions for  $\text{Po}$  and  $\text{Po}(\text{g})$  from SGTE [2] are plotted for comparison.

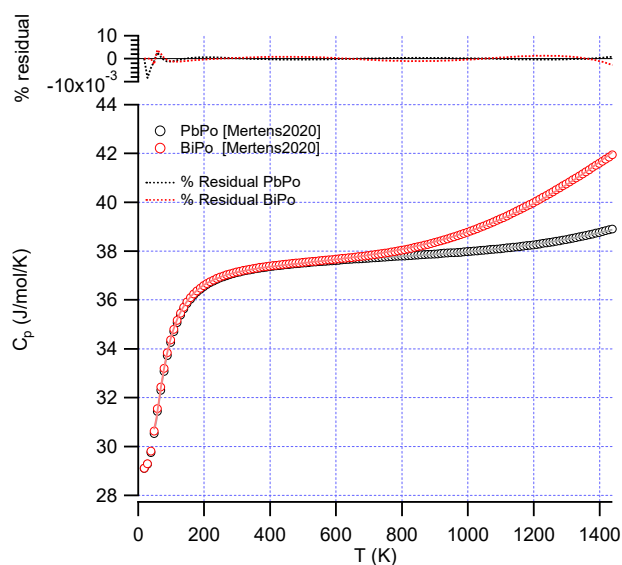

**Figure S2.** (markers) Heat capacity of PbPo(g) and BiPo(g) by Mertens [1] and (lines) fits according to equation SM1 between 48.15 K and 1438.15 K. Top: relative residuals.

## 2. PbPo(s)

The temperature dependence of the heat capacity  $C_p$  of PbPo(s) was estimated by simultaneously fitting the extrapolated enthalpy ( $H$ ) and entropy ( $S$ ) data obtained by Eichler [3] (Figure. S4) according to the correlation for  $C_p$  (Eq. S1) with  $C=D=E=F=0$  and the following relations:

$$S = S(298.15K) + \int_{298.15}^T \frac{C_p(T)}{T} dT = S(298.15K) + A \ln(T) + 10^{-3}BT \quad (S2)$$

$$H = H(298.15K) + \int_{298.15}^T C_p(T) dT = H(298.15K) + AT + \frac{1}{2}10^{-3}BT^2$$

The optimized coefficients were  $A = 47.368$  and  $B = 16.164$ .

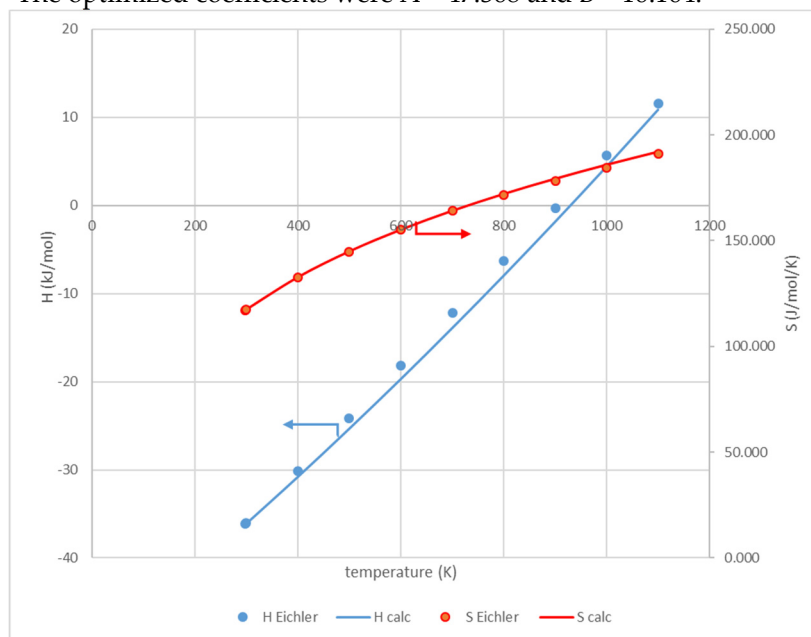

**Figure S3.** (markers) Enthalpy and entropy of PbPo(s) obtained by extrapolation by Eichler [3]. (curves) fits according to Equation (S2).

The resulting Gibbs energy functions ( $G=H-TS$ ) for PbPo(s) were calculated (Figure S4). The current, optimized data predict a more stable PbPo(s) compound than when Eichler's data are used.

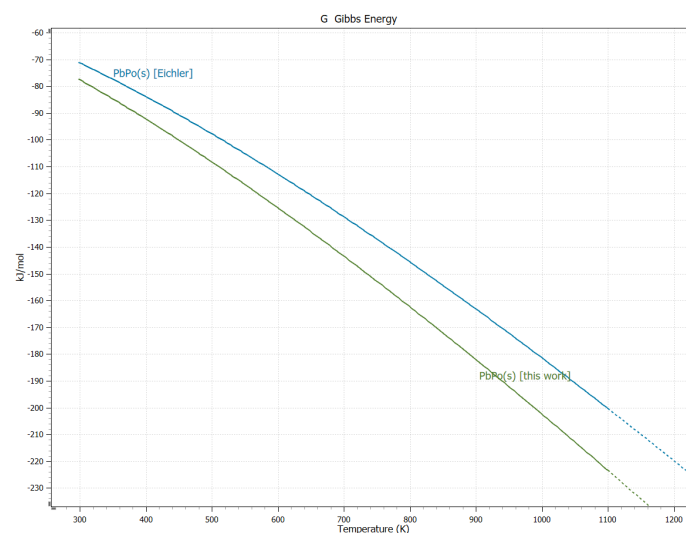

**Figure S4.** Gibbs energy  $G$  of  $\text{PbPo(s)}$ : comparison of  $G$  calculated from Eichler's extrapolation results and from the optimization presented in this work.

## References

1. Mertens, M.A.J.; Cottenier, S. *Ab Initio Predicted Binding Energies of Small and Medium-Sized Po-Containing Molecules. Deliverable D4.2 of the European Union H2020 MYRTE Project*; 2019.
2. SGTE Thermodynamic Properties of Elements, Ni to S6. In *Landolt-Börnstein - Group IV Physical Chemistry · Volume 19A1: "Pure Substances. Part 1 Elements and Compounds from AgBr to Ba3N2"*; Lehrstuhl für Werkstoffchemie; Rheinisch-Westfälische Technische Hochschule Aachen (on behalf of SGTE), Ed.; Springer-Verlag Berlin Heidelberg, 1999.
3. Eichler, B.; Neuhausen, J. *Verflüchtigungspfade Des Poloniums Aus Einem Pb-Bi-Spallationstarget. Report of the Paul Scherrer Institut 04-06*; Villigen, Switzerland, 2004.
